# Supplementary material for: Preparation and properties of expanded perlite-based paraffin phase change reinforced concrete
Source: Research Square preprint supplement (doi:10.21203/rs.3.rs-7350258/v1), 2025-10-07
Supplement: Supplementary file 1 [file daff07a9ad3aa9518fa124e2.docx]

**1.Data Sharing Statement:**All authors have agreed to share the original data. The data presented in the manuscript are the original data, with the specific content shown in the tables below.

Table 1 Experimental variable information

| serial number | PCM Admixture (%) | Reinforcement or not |
| --- | --- | --- |
| C-1 | 10 | NO |
| C-2 | 20 | NO |
| C-3 | 30 | NO |
| C-4 | 40 | NO |
| R-1 | 10 | YES |
| R-2 | 20 | YES |
| R-3 | 30 | YES |
| R-4 | 40 | YES |

Table 2 Materials required for PCM preparation

| name (of a thing) | Model parameters | manufacturer (of a product) |
| --- | --- | --- |
| Solid paraffin | 58# | China National Petroleum Corporation |
| Liquid paraffin | AR Analytical Pure | Produced by Tianjin Chemical Industry No.3 Factory Co. |
| Complex paraffin(PA) | PA58# | Liquid paraffin: solid paraffin = 5:5 |
| Expanded Perlite (EP) | Grain size 1-2mm | Hebei Yixin Energy-saving and Environmental Protection Building Materials |
| Gurkha spray adhesive | 901 | Goodyear Chemical Technology Co. |

Table 3 Experimental materials and instruments

| name (of a thing) | Model parameters | manufacturer (of a product) |
| --- | --- | --- |
| PCM | PCM-G | - |
| clinker | PC-42.5 | Shandong Shanshui Cement Group Co. |
| coal ash | first class | Henan Rongchangsheng Environmental Protection Material Co. |
| silica fume | 96. | Henan Hengyuan New Material Co. |
| ISO sand | China ISO Standard Sand | Xiamen Aceo Standard Sand Co. |
| rock | limestone | Chenyang Home Living |
| water reducing agent | Polycarboxylic acid water reducing agent | Tianjin Weihe Technology Development Co. |
| molds | 100× 100× 100 | Jiaxin Testing Instrument Factory |
| Pressure testing machine | TYE-3000B | Wuxi Building Material Instrument Machinery Co. |

Table 4 C-Y mixing ratios

| serial number | Water  (kg/m³) | Cement  (kg/m³) | ISO sand  (kg/m³) | Stone  (kg/m³) | PCM  (kg/m³) | Water reducing agent  (kg/m³) |
| --- | --- | --- | --- | --- | --- | --- |
| C-1 | 166.55 | 439.03 | 439.53 | 1192.19 | 12.21 | 0.48 |
| C-2 | 166.55 | 439.03 | 390.73 | 1192.19 | 24.48 | 0.37 |
| C-3 | 166.55 | 439.03 | 341.11 | 1192.19 | 36.55 | 0.25 |
| C-4 | 166.55 | 439.03 | 293.13 | 1192.19 | 48.83 | 0.12 |

Table 5 R-Y mixing ratios

| serial number | Water  (kg/m³) | Cement  (kg/m³) | ISO sand  (kg/m³) | Stone  (kg/m³) | PCM  (kg/m³) | Water reducing agent(kg/m³) | Silica fume  (kg/m³) | Fly ash  (kg/m³) |
| --- | --- | --- | --- | --- | --- | --- | --- | --- |
| R-1 | 166.55 | 359.75 | 439.03 | 4882 | 12.21 | 1.22 | 35.48 | 44 |
| R-2 | 166.55 | 359.75 | 390.73 | 4882 | 24.48 | 0.85 | 35.48 | 44 |
| R-3 | 166.55 | 359.75 | 341.93 | 4882 | 36.55 | 0.61 | 35.48 | 44 |
| R-4 | 166.55 | 359.75 | 293.13 | 4882 | 48.83 | 0.37 | 35.48 | 44 |

Table 6 Ordinary PCM concrete data analysis

| serial number | PCM share (%) | Compressive strength (MPa) | Rate of decrease in compressive strength (%) | Rate of decrease in compressive strength (%) |
| --- | --- | --- | --- | --- |
| C-1 | 10 | 43.99 | / | / |
| C-2 | 20 | 35.94 | 18.30 | 18.30 |
| C-3 | 30 | 30.42 | 30.85 | 14.16 |
| C-4 | 40 | 26.25 | 40.32 | 13.71 |

Table 7 Reinforce PCM concrete data analysis

| serial number | PCM share (%) | Compressive strength (MPa) | Rate of decrease in compressive strength (%) | Rate of decrease in compressive strength (%) |
| --- | --- | --- | --- | --- |
| R-1 | 10 | 45.24 | / | / |
| R-2 | 20 | 38.43 | 15.05 | 15.05 |
| R-3 | 30 | 34.63 | 23.45 | 9.89 |
| R-4 | 40 | 33.61 | 25.71 | 2.95 |
